# Supplementary material for: Downregulation of SFRP1 is a protumorigenic event in hepatoblastoma and correlates with beta-catenin mutations
Source: Springer Nature journal article supplement (doi:10.1007/s00432-020-03182-1), 2020-03-18

APC

control

3d

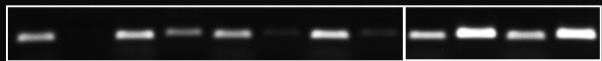

3d

5d

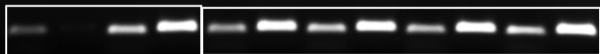

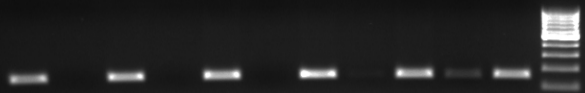

DKK1 - control

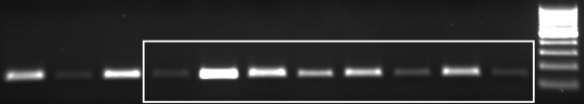

DKK 3d

DKK1 5d

SFRP1

control

3d

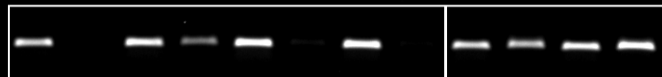

3d

5d

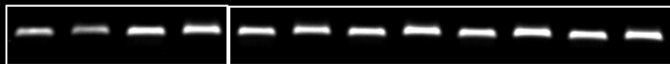

WIF1 3d

WIF1 control

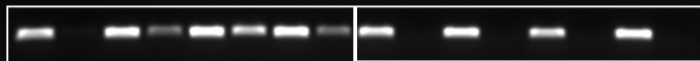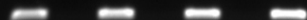

WIF1 5d

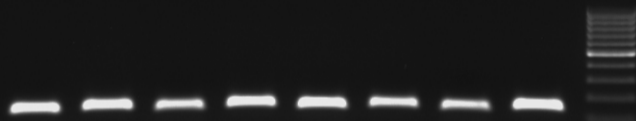

Sss1 5-Aza N110 N146

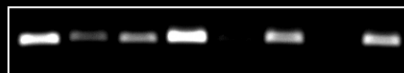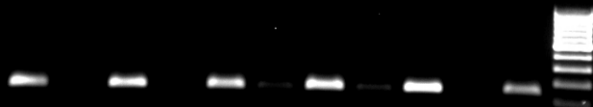

shiva Exp. Time: 0.08 sec Upper: 184 Lower: 86 Int.: 0

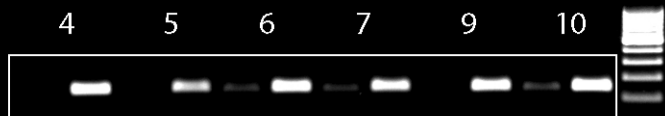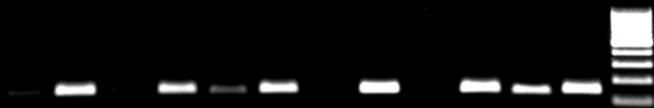



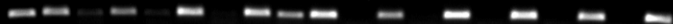

198 227 253 254

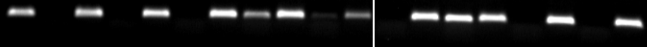

Supplement: MOESM3 [file 17811580]
