# Supplementary material for: Downregulation of SFRP1 is a protumorigenic event in hepatoblastoma and correlates with beta-catenin mutations
Source: PubMed Central journal article supplement (PMC7142044; doi:10.1007/s00432-020-03182-1), 2020-03-18

**a**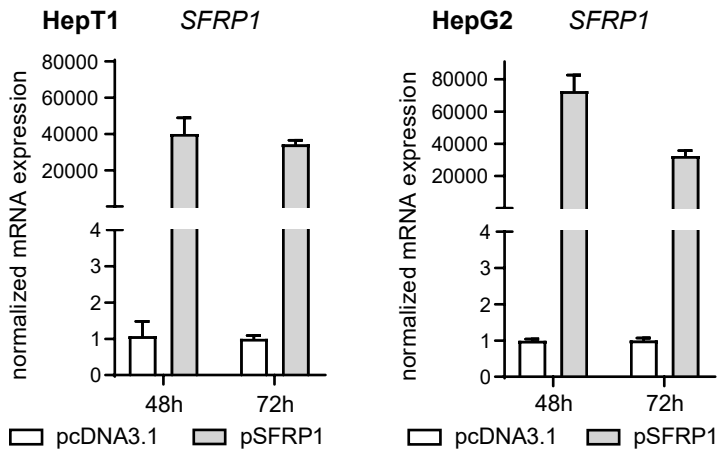**b**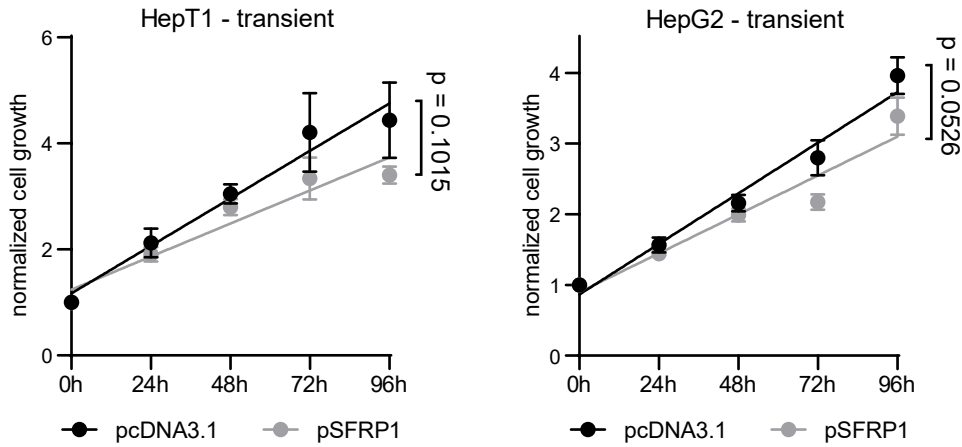**c**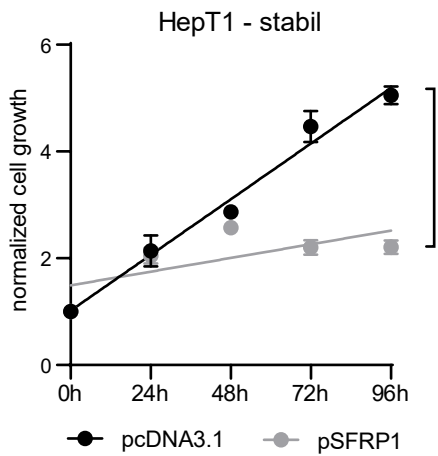**d**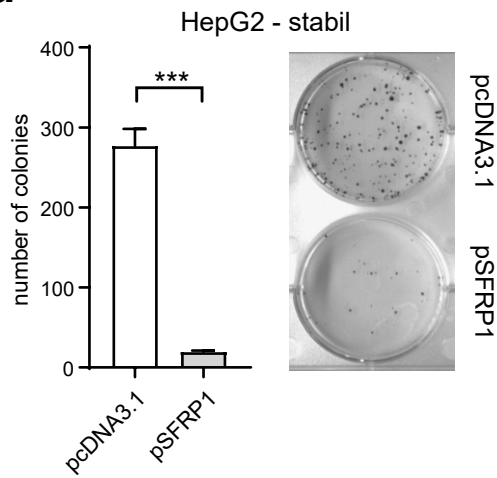**e**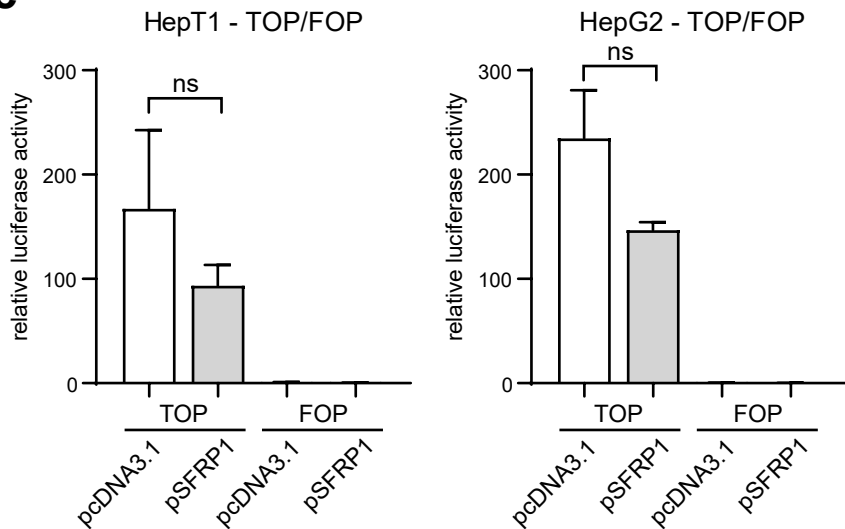

Supplement: 432_2020_3182_MOESM5_ESM.pdf [file 432_2020_3182_MOESM5_ESM.pdf]
