# Supplementary material for: Downregulation of SFRP1 is a protumorigenic event in hepatoblastoma and correlates with beta-catenin mutations
Source: Springer Nature journal article supplement (doi:10.1007/s00432-020-03182-1), 2020-03-18

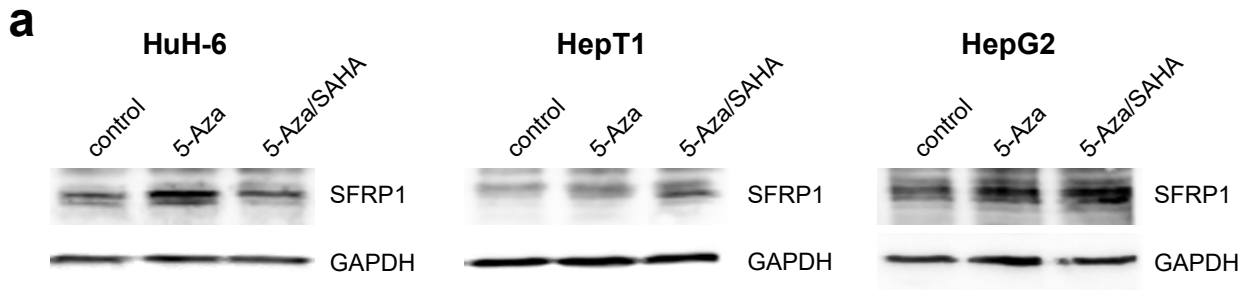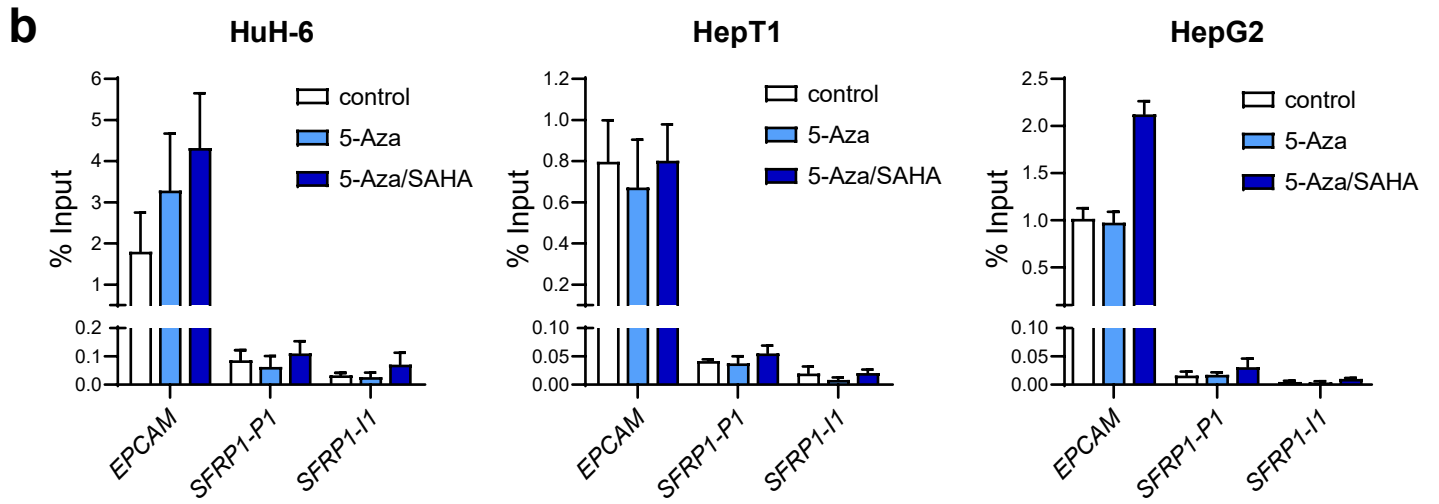

Supplement: MOESM4 [file 17811580]
